# Supplementary material for: Rational design of small molecule hole-transporting materials with a linear π-bridge for highly efficient perovskite solar cells
Source: Royal Society of Chemistry journal article supplement (doi:10.1039/d2cp02036j), 2022-01-01
Supplement: d2cp02036j1.pdf [file d2cp02036j1.pdf]

## Supporting information for:

### **Rational design of small molecule hole-transporting materials with linear $\pi$ -bridge for highly efficient perovskite solar cells**

Wenjing Zhu, Keyu Zhou, Yumeng Fo, Yi Li, Bin Guo, Xinyu Zhang,

Xin Zhou\*

*College of Environment and Chemical Engineering, Dalian University, Dalian 116622,  
Liaoning, China*

\* Corresponding authors.

*E-mail addresses:* [zhouxin@dlu.edu.cn](mailto:zhouxin@dlu.edu.cn).

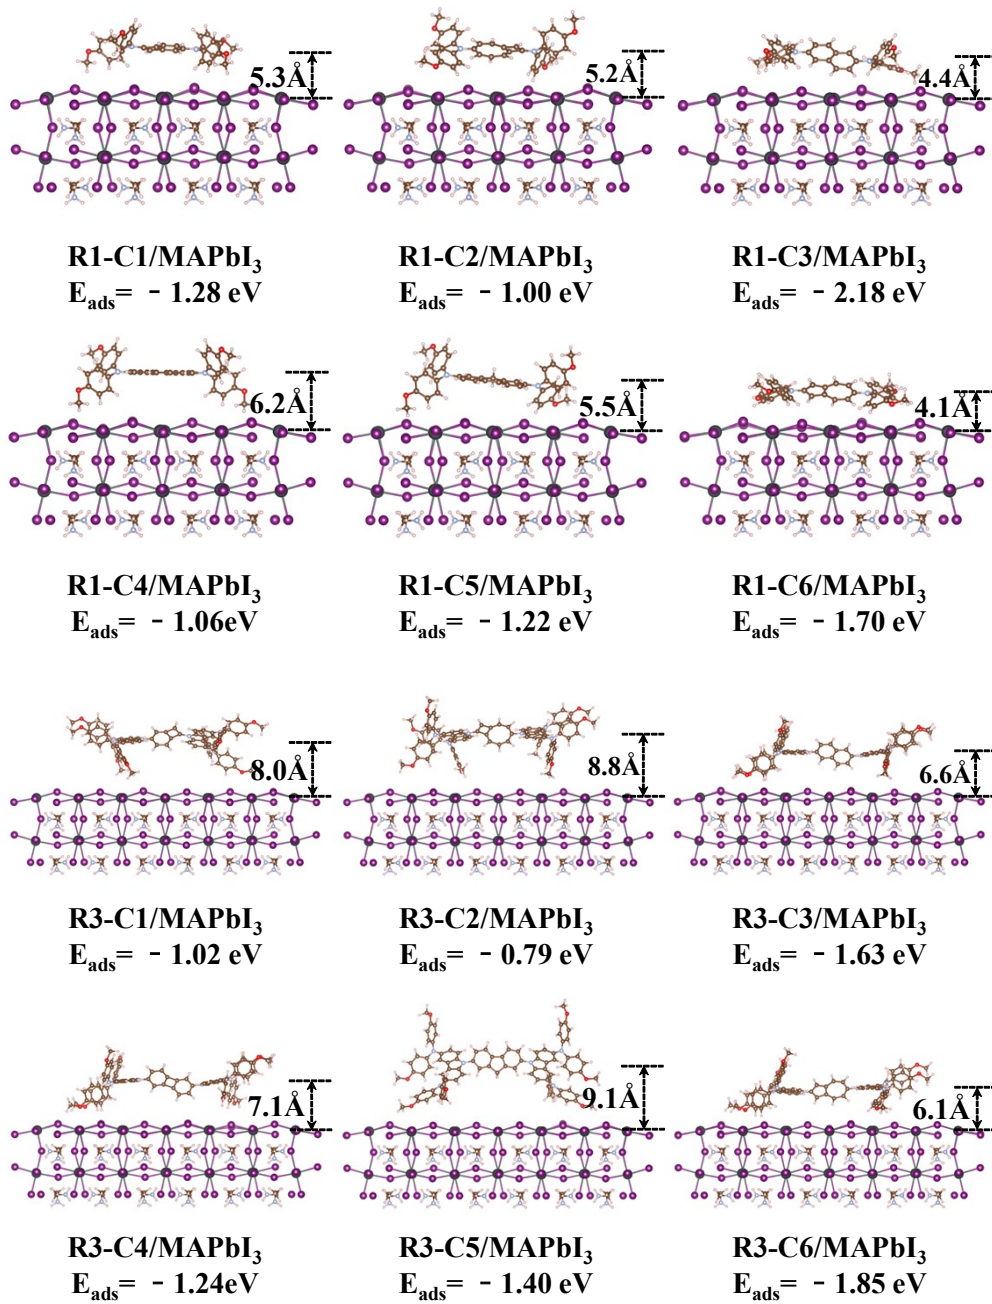

**Fig. S1.** The optimized structures and adsorption energy of R1-C<sub>n</sub> and R3-C<sub>n</sub> (n=1-6) absorbed on the PbI<sub>2</sub>-terminated MAPbI<sub>3</sub>(110) surface. The arrows indicate the distances between the MAPbI<sub>3</sub> surface and the centroid of HTM.
